# Supplementary material
Source: PubMed Central journal article supplement (PMC2633584)
Supplement: 0807057106_Appendix_PDF.pdf [file 0807057106_Appendix_PDF.pdf]

## SI APPENDIX

### Mutagenesis Primers

#### Mutation Forward Primer Sequence

V299M CCACCCATCCATGGGCCGCCAGCAC

R522K CTTGGCTGCGCAAGAGCCCAGGTGAGGAGGTGGTGGC

K570N GAGACCACGTTTCAAACAACAGGCTCTTTTTCTACCG

A1062T CAAGGGCGCCACCGGCCCTCTG

#### Reverse Primer Sequence

GTGCTGGCGGCCCATGGATGGGTGG

GCCACCACCTCCTCACCTGGGCTCTTGCGCAGCCAAG

CGGTAGAAAAAGAGCCTGTTGTTTTGAAACGTGGTCTC

CAGAGGGCCGGTGGCGCCCTTG

Mutagenesis PCR conditions: 95 °C for 2 min, followed by 12 cycles of 95 °C for 30 s, 55 °C for 1 min, and 72 °C for 10 min, and concluded at 72 °C for 10 min.

### Amplification and Sequencing of FLAG-TERT, FLAG-TERC, and FLAG Inserts

#### Amplification

Forward CTAAGTAGAGAACCCACTGCTTAC

Reverse GATGGCTGGCAACTAGAAGGCACAG

#### Sequencing

427F CAACACGGTGACCGACGCAC

514R CAGCAGGTGAACCAGCACGTCG

843F GTGGACCGAGTGACCGTGGTTTC

887R GTCTGGCAGGTGACACCACACAG

1228F CCTGTTTCTGGAGCTGCTTGG

1411R GAGCAGCTGCACCAGGCGACGG

1697F CTGATGAGTGTGTACGTCGTCG

1760R GAAACGTGGTCTCCGTGAC

2176F CTTTGTCAAGGTGGATGTGACG

2258R GTTTGATGATGCTGGCGATGAC

2566F CTCCACGCTGCTCTGCAGCCTGTG

2660R CATCCACCAAACGCAGGAGC

2959F GAACATGCGTCGCAAACCTTTG

3040R CTGGAGGCTGTTACCTGCAAATC

FLAG-TERT amplification: 95° C for 5 min, followed by 35 cycles of 95 °C for 30 s, 55 °C for 50 s, and 72 °C for 4 min, and concluded at 72 °C for 5 min.

FLAG-TERC and FLAG amplification: 95 °C for 5 min, followed by 35 cycles of 95 °C for 30 s, 55 °C for 50 s, and 72 °C for 1 min, and concluded at 72 °C for 3 min.

### **Assessment of TERC Expression by Real-Time Polymerase Chain Reaction**

TERC Real-Time Primers

TERC R      AAG AGT TGG GCT CTG TCA GC

TERC L      ATG TGT GAG CCG AGT CCT G

TERC Probe 5' 6-FAM/TCC GTT CCT CTT CCT GCG GC/3' -TAMSp

### **ASO Hybridization for High-Throughput A1062T Mutation Screen**

Amplification

Exon 15TERT-Fwd                      tgtaaacgacgccagtGGTCAGAAGGCTCCCAAGCG

Exon 15TERT-Rev                      caggaaacagctatgaccTCGTGACTCCTGCGGTGCTT

Allele Specific Oligonucleotides

1509 (wild type)                      GGGCGCCGCCGGCCCTCT

1510 (A1062T variant)                GGGCGCCACCGGCCCTCT
